# Supplementary material
Source: Springer Nature journal article supplement (https://www.springermedizin.de/resource/supplementary/13054_2013_2875_MOESM1_ESM.pdf/9714066)

**A**

### Hypnogram

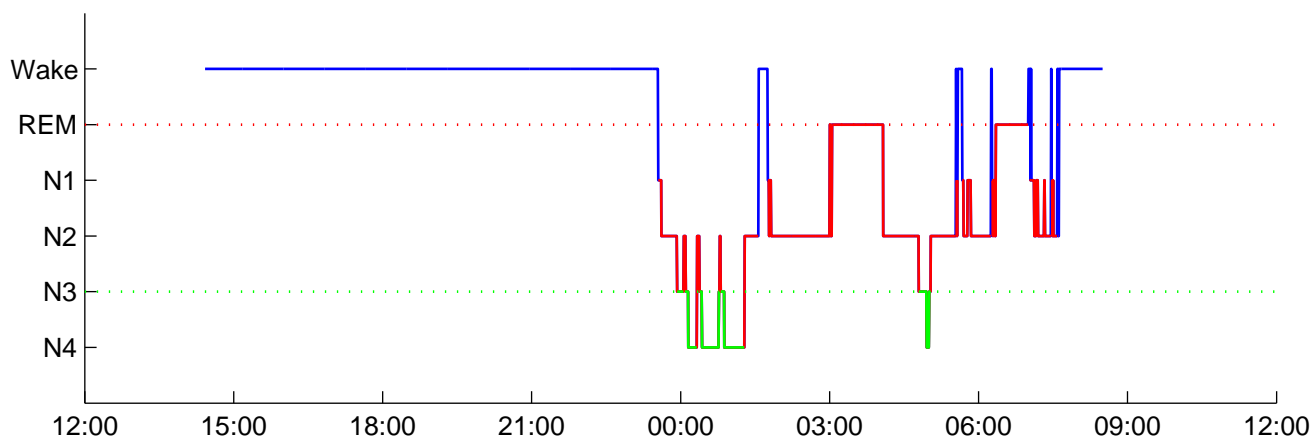**B**

### IDOS

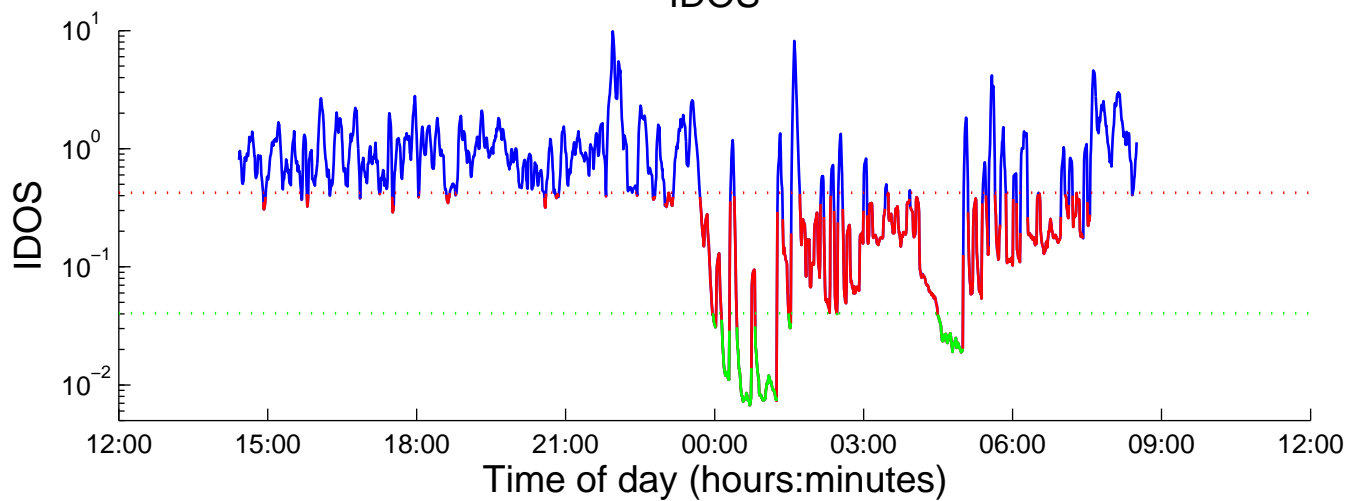

Supplement: MOESM1 [file 9714066]
